# Supplementary material for: Plutonium concentrations link soil organic matter decline to wind erosion in ploughed soils of South Africa
Source: Copernicus journal article supplement (doi:10.5194/egusphere-2024-1312), 2024-06-20
Supplement: Supplementary file 1 [file Mohren_et_al_Supplement.docx]

**Plutonium concentrations link soil organic matter decline to wind erosion in ploughed soils of South Africa**

Joel Mohren1,2*, Hendrik Wiesel3,4, Wulf Amelung5, L. Keith Fifield6, Alexandra Sandhage-Hofmann5, Erik Strub3, Steven A. Binnie1, Stefan Heinze7, Elmarie Kotze8, Chris Du Preez8, Stephen G. Tims6, Tibor J. Dunai1

1Institute of Geology and Mineralogy, University of Cologne, Zülpicher Str. 49b, 50674 Cologne, Germany.

2Chair of Physical Geography and Geoecology, RWTH Aachen University, Wüllnerstr. 5b, 52062 Aachen, Germany

3Division of Nuclear Chemistry, University of Cologne, Zülpicher Str. 45, 50674 Cologne, Germany.

4Advanced Nuclear Fuels GmbH, Am Seitenkanal 1, 49811 Lingen, Germany.

5Institute of Crop Science and Resource Conservation, Soil Science and Soil Ecology, University of Bonn, Nussallee 13, 53115 Bonn, Germany.

6Department of Nuclear Physics and Accelerator Applications, Research School of Physics. The Australian National University, Canberra, ACT 2601, Australia

7CologneAMS, Institute of Nuclear Physics, University of Cologne, Zülpicher Str. 77, 50937 Cologne, Germany.

8Department of Soil, Crop and Climate Sciences, University of the Free State, P.O. Box 339, Bloemfontein 9300, Republic of South Africa.

*Correspondence to*: Joel Mohren (joel.mohren@uni-koeln.de)

#
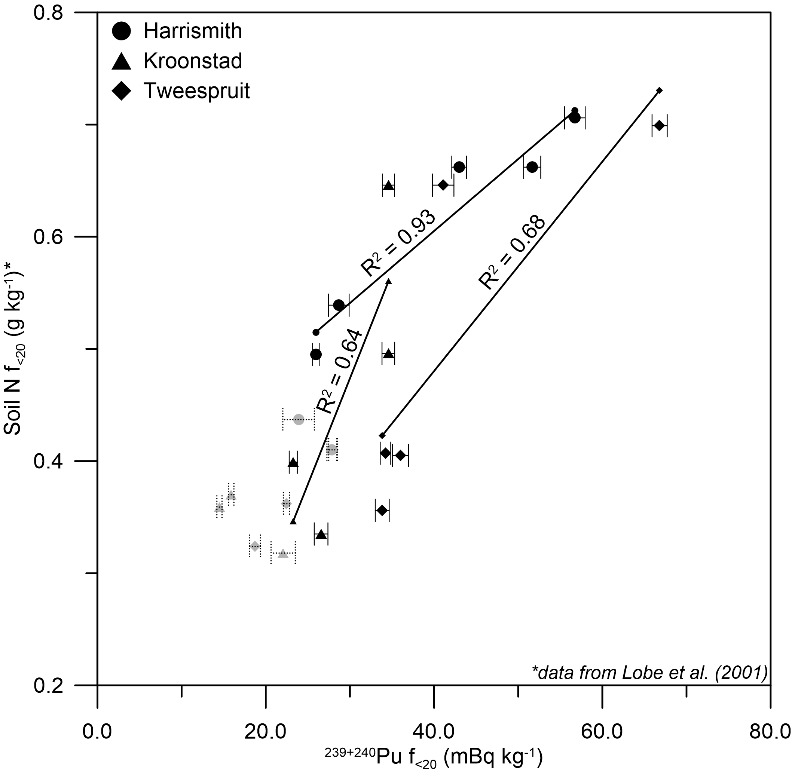
1 Supplementary figures

Figure S: Linear correlations between soil N contents (Lobe et al., 2001) and 239+240Pu concentrations in the clay and silt soil fractions, here defined as the soil fractions <20 µm. Most plutonium samples depict replicate measurements; the corresponding concentrations are weighted means and the uncertainties either dominated by AMS counting statistics (weighted mean error) or external sources of uncertainty (standard error). For single measurements, the 1σ measurement uncertainty provided by the AMS facilities dominates the final uncertainty. (vertical error bars either represent 1σ from the mean of several replicates or a 1σ error-propagated uncertainty dominated by the AMS measurement uncertainty). Samples from sites that have been cropped before 1963 were excluded from the regression (greyed out data points).


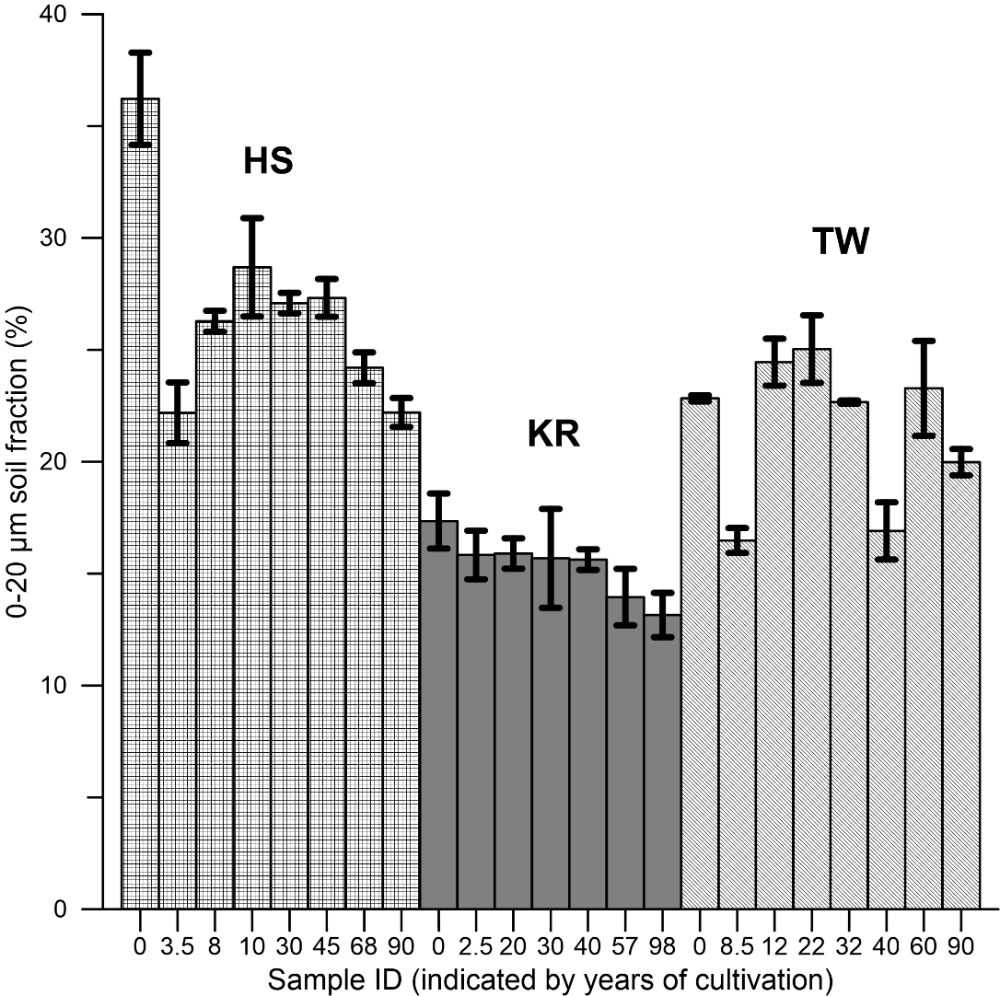


Figure S2: Grain size data measured by Lobe et al. (2001) and Amelung et al. (2002). Uncertainties are 1σ standard deviations of the arithmetic means (*n* >2 replicates per sample).

# 2 Supplementary tables

Table S3: Ratios of 137Cs against 239+240Pu.

| Sample ID | | | 137Cs/239+240Pu | | |
| --- | --- | --- | --- | --- | --- |
| HS | 0 | /0-20 | 18.68 | ± | 2.33 |
| HS | 45 | /0-20 | 22.85 | ± | 4.25 |
| KR | 0 | /0-20 | 33.24 | ± | 3.54 |
| KR | 40 | /0-20 | 25.16 | ± | 5.06 |
| TW | 0 | /0-20 | 30.54 | ± | 2.58 |
| TW | 8 | /0-20 | 31.88 | ± | 3.78 |
| TW | 12 | /0-20 | 28.60 | ± | 2.61 |
| TW | 32 | /0-20 | 28.34 | ± | 3.26 |
| TW | 40 | /0-20 | 29.64 | ± | 3.25 |
| TW | 60 | /0-20 | 22.71 | ± | 3.14 |
| TW | 90 | /0-20 | 26.17 | ± | 4.89 |
|  | *Weighted average* | | *26.69* | *±* | *0.97* |

**Sample abbreviations include the agroecosystem (HS- Harrismith, KR – Kroonstad, TW – Tweespruit), years of cultivation, and sampling depth. Sample HS0/0-20 was not included into the calculation of the weighted mean (see main text for discussion).**

Table S4: 239+240Pu specific activies in topsoil samples and corresponding SOM data as published by Lobe et al. (2001).

|  |  |  | 239+240Pu | | | Bulk soil C | Bulk soil N |
| --- | --- | --- | --- | --- | --- | --- | --- |
| Sample ID | | | (mBq kg-1) | | | (g kg-1) | (g kg-1) |
| HS | 0 | /0-20 | 56.73 | ± | 1.23 | 20.6 | 1.60 |
| HS | 3.5 | /0-20 | 51.66 | ± | 1.02 | 11.0 | 1.04 |
| HS | 8 | /0-20 | 42.98 | ± | 0.87 | 13.5 | 1.11 |
| HS | 10 | /0-20 | 28.68 | ± | 1.23 | 10.6 | 0.94 |
| HS | 30 | /0-20 | 25.95 | ± | 0.39 | 9.28 | 0.88 |
| HS | 45 | /0-20 | 26.69 | ± | 1.24 | 8.62 | 0.79 |
| HS | 68 | /0-20 | 23.90 | ± | 1.88 | 6.75 | 0.66 |
| HS | 90 | /0-20 | 27.85 | ± | 0.58 | 6.33 | 0.66 |
| KR | 0 | /0-20 | 34.59 | ± | 0.72 | 7.97 | 0.85 |
| KR | 2.5 | /0-20 | 34.57 | ± | 0.75 | 5.28 | 0.61 |
| KR | 20 | /0-20 | 23.27 | ± | 0.48 | 3.96 | 0.49 |
| KR | 30 | /0-20 | 26.58 | ± | 0.81 | 2.85 | 0.46 |
| KR | 40 | /0-20 | 15.90 | ± | 0.31 | 3.38 | 0.45 |
| KR | 57 | /0-20 | 22.07 | ± | 1.44 | 2.92 | 0.43 |
| KR | 98 | /0-20 | 14.49 | ± | 0.31 | 2.68 | 0.40 |
| TW | 0 | /0-20 | 66.80 | ± | 0.90 | 11.7 | 1.12 |
| TW | 8 | /0-20 | 41.09 | ± | 1.27 | 7.10 | 0.73 |
| TW | 12 | /0-20 | 36.19 | ± | 0.51 | 6.44 | 0.67 |
| TW | 22 | /0-20 | 33.47 | ± | 0.82 | 5.83 | 0.58 |
| TW | 32 | /0-20 | 34.23 | ± | 0.63 | 5.30 | 0.61 |
| TW | 40 | /0-20 | 28.00 | ± | 0.45 | 4.42 | 0.52 |
| TW | 60 | /0-20 | 22.46 | ± | 0.37 | 5.32 | 0.60 |
| TW | 90 | /0-20 | 18.73 | ± | 0.65 | 4.32 | 0.54 |

**Sample abbreviations include the agroecosystem (HS- Harrismith, KR – Kroonstad, TW – Tweespruit), years of cultivation, and sampling depth. The quoted plutonium concentrations from replicate measurements are weighted means and the uncertainties either dominated by AMS counting statistics (weighted mean error) or external sources of uncertainty (standard error).**

# References

Amelung, W., Lobe, I., and Du Preez, C. C.: Fate of microbial residues in sandy soils of the South African Highveld as influenced by prolonged arable cropping, European Journal of Soil Science, 53, 29-35, 2002.

Lobe, I., Amelung, W., and Du Preez, C. C.: Losses of carbon and nitrogen with prolonged arable cropping from sandy soils of the South African Highveld, European Journal of Soil Science, 52, 93-101, 2001.
