# Supplementary material for: Plutonium concentrations link soil organic matter decline to wind erosion in ploughed soils of South Africa
Source: Copernicus journal article supplement (doi:10.5194/egusphere-2024-1312), 2024-06-20
Supplement: Supplementary file 2 [file Supplement_Tables_S1_S2_v2.xlsx]

## Sheet: Table S1
Table S1. Topsoil sample properties
			ρ			<2 µm				2-20 µm				20-250 µm				250-2000 µm				0-20 µm
Sample			(g cm-3)			(%)			n	(%)			n	(%)			n	(%)			n	(%)
HS	0	/0-20	1.28	±	0.12	21.2667	±	1.97428	3	14.9556	±	0.587209	3	61.8089	±	0.53393	3	3.01167	±	0.260676	4	36.2222	±	2.05976
HS	3.5	/0-20	1.3			13.1444	±	0.900823	3	9.04444	±	1.01452	3	72.6811	±	0.784873	3	5.34889	±	0.77722	3	22.1889	±	1.35674
HS	5	/0-20	-			-			-	-			-	-			-	-			-	-
HS	8	/0-20	1.3			13.1556	±	0.221944	3	13.1222	±	0.414103	3	69.7933	±	0.434984	3	3.69444	±	0.151889	3	26.2778	±	0.469831
HS	10	/0-20	1.3			16.1889	±	2.13186	3	12.5	±	0.52915	3	66.89	±	0.348186	3	5.70444	±	0.170826	3	28.6889	±	2.19655
HS	30	/0-20	1.25			15.5222	±	0.435039	3	11.5667	±	0.133333	3	67.1644	±	1.19648	3	5.72556	±	0.881566	3	27.0889	±	0.455013
HS	45	/0-20	1.31			15.9333	±	0.666667	3	11.3889	±	0.518902	3	69.3444	±	0.764034	3	3.31778	±	0.606047	3	27.3222	±	0.84481
HS	68	/0-20	1.43			15.6222	±	0.435039	3	8.57778	±	0.5295	3	70.0833	±	1.17934	3	4.84167	±	0.828736	4	24.2	±	0.685295
HS	90	/0-20	1.29			14.2222	±	0.585314	3	7.97778	±	0.277555	3	68.3222	±	0.544103	3	9.60667	±	0.539145	3	22.2	±	0.647788
KR	0	/0-20	1.42	±	0.04	12.4	±	1.17757	4	4.95	±	0.349073	4	78.0775	±	1.87984	4	5.7025	±	0.326614	4	17.35	±	1.22822
KR	2.5	/0-20	1.47			11.7333	±	1.076	4	4.1	±	0.156347	4	78.5275	±	0.41859	4	5.90333	±	0.431432	4	15.8333	±	1.0873
KR	20	/0-20	1.4			12.075	±	0.579511	4	3.825	±	0.351057	4	76.8958	±	0.819134	4	6.78	±	0.691284	4	15.9	±	0.67755
KR	30	/0-20	1.42			12.0352	±	1.80071	18	3.65	±	1.27916	18	76.2706	±	3.55519	18	8.25778	±	1.36231	18	15.6852	±	2.2088
KR	40	/0-20	1.51			12.2067	±	0.197765	5	3.42	±	0.418064	5	75.648	±	1.38262	5	7.99933	±	0.908385	5	15.6267	±	0.462481
KR	57	/0-20	1.53			11.25	±	1.23985	6	2.7	±	0.256472	6	76.8739	±	0.773653	6	9.14833	±	0.664552	6	13.95	±	1.2661
KR	98	/0-20	1.49			10.5833	±	0.957717	6	2.56667	±	0.241293	6	79.8539	±	1.29156	6	6.38333	±	0.664861	6	13.15	±	0.987646
TW	0	/0-20	1.46	±	0.08	12.7833	±	0.117851	2	10.05	±	0.0707107	2	70.7	±	0.179134	2	6.54167	±	0.0919239	2	22.8333	±	0.137437
TW	8	/0-20	1.5			10.0778	±	0.491408	3	6.4	±	0.260342	3	71.1344	±	0.0287389	3	12.1467	±	0.202978	3	16.4778	±	0.556111
TW	12	/0-20	1.49			13.6667	±	0.801388	2	10.7833	±	0.683537	2	72.37	±	0.410122	2	2.324	±	0.105499	5	24.45	±	1.0533
TW	22	/0-20	1.51			13.15	±	1.39064	2	11.8833	±	0.589256	2	65.5583	±	0.0353553	2	8.25333	±	0.249844	2	25.0333	±	1.51033
TW	32	/0-20	1.57			14.7167	±	0.0235702	2	7.95	±	0.0707107	2	69.775	±	0.233345	2	5.835	±	0.0919239	2	22.6667	±	0.0745356
TW	40	/0-20	1.45			10.7533	±	0.496432	5	6.15333	±	1.17724	5	78.588	±	0.760554	5	3.88619	±	1.00018	7	16.9067	±	1.27763
TW	60	/0-20	1.56			16.0667	±	2.08513	3	7.21111	±	0.403228	3	73.0744	±	0.272485	3	2.80556	±	0.0952385	3	23.2778	±	2.12376
TW	90	/0-20	1.54			14.3889	±	0.573811	3	5.58889	±	0.126198	3	75.3011	±	0.387016	3	3.92778	±	0.259322	3	19.9778	±	0.587525
No data available for depth samples and sample HS5/0-20.
Soil bulk density data cited from Lobe 2003 (dissertation).
Grain size distributions measured by Lobe et al. 2001 and Amelung et al. 2002 (replicate measurements).

## Sheet: Table S2
Table S2. 239,240Pu sample details and AMS measurement results.
			Batch/AMS	Sample mass			Spike mass
Sample ID			ID	(g)			(g)			239Pu/242Pu			240Pu/242Pu			240Pu/239Pu
HS	0	/0-20	COL-2	21.0631	±	0.0001	0.2261	±	0.0001	0.064461	±	0.001555	0.011343	±	0.000341	0.175967	±	0.00678257
			ANU-M465	21.786	±	0.0001	0.2102	±	0.0001	0.0686849	±	0.0023359	0.0125295	±	0.000750608	0.18242	±	0.0125665
		/20-40	ANU-M464	19.7157	±	0.0001	0.2161	±	0.0001	0.00433576	±	0.000534121	0.000788722	±	0.000185848	0.181911	±	0.0483686
			ANU-M465	19.7157	±	0.0001	0.2161	±	0.0001	0.0027397	±	0.000379838	0.000397273	±	0.00011942	0.145006	±	0.0480016
HS	3.5	/0-20	COL-5	21.3095	±	0.0001	0.2282	±	0.0001	0.05695	±	0.00139	0.010679	±	0.000329	0.187515	±	0.00737024
HS	5	/0-20	COL-3	21.7641	±	0.0001	0.2267	±	0.0001	0.055757	±	0.001345	0.010414	±	0.00031	0.186775	±	0.0071562
			COL-4	21.2989	±	0.0001	0.2251	±	0.0001	0.059897	±	0.001415	0.009808	±	0.000279	0.163748	±	0.00605484
HS	8	/0-20	COL-3	22.6056	±	0.0001	0.2269	±	0.0001	0.051522	±	0.001269	0.00921	±	0.000296	0.178759	±	0.00723821
			COL-4	22.2033	±	0.0001	0.2271	±	0.0001	0.052906	±	0.001264	0.008863	±	0.000262	0.167524	±	0.00636735
HS	10	/0-20	COL-3	22.3677	±	0.0001	0.2267	±	0.0001	0.03263	±	0.000818	0.006167	±	0.000207	0.188998	±	0.00791789
			COL-4	22.3803	±	0.0001	0.2272	±	0.0001	0.036762	±	0.000905	0.006027	±	0.0002	0.163946	±	0.00677401
HS	30	/0-20	COL-3	22.3626	±	0.0001	0.227	±	0.0001	0.030388	±	0.000774	0.005859	±	0.000205	0.192806	±	0.00834425
			COL-5	22.2042	±	0.0001	0.2273	±	0.0001	0.029819	±	0.00076	0.005674	±	0.0002	0.190281	±	0.0082768
HS	45	/0-20	ANU-M465	22.3346	±	0.0001	0.2174	±	0.0001	0.0355495	±	0.00167394	0.00537975	±	0.000516494	0.151331	±	0.0161822
		/20-40	ANU-M464	19.6651	±	0.0001	0.208	±	0.0001	0.0465264	±	0.00168353	0.00818609	±	0.000699187	0.175945	±	0.0163207
			ANU-M465	19.6651	±	0.0001	0.208	±	0.0001	0.0476452	±	0.00123839	0.0083258	±	0.000412892	0.174746	±	0.0097841
HS	68	/0-20	COL-3	22.5918	±	0.0001	0.2275	±	0.0001	0.033918	±	0.000876	0.005143	±	0.000202	0.15163	±	0.00712774
			COL-5	22.9885	±	0.0001	0.2277	±	0.0001	0.027625	±	0.0007	0.004746	±	0.00017	0.171801	±	0.00753799
HS	90	/0-20	COL-3	23.0099	±	0.0001	0.2275	±	0.0001	0.034889	±	0.000906	0.00646	±	0.00024	0.185159	±	0.00839279
			COL-5	20.2017	±	0.0001	0.2281	±	0.0001	0.029092	±	0.000729	0.005214	±	0.000179	0.179225	±	0.00761761
KR	0	/0-20	COL-2	22.8521	±	0.0001	0.2291	±	0.0001	0.040678	±	0.0011	0.007711	±	0.000315	0.189562	±	0.00928666
			ANU-M465	19.8511	±	0.0001	0.2162	±	0.0001	0.0366995	±	0.00167153	0.00699552	±	0.000562096	0.190616	±	0.0176057
KR	2.5	/0-20	COL-5	25.7017	±	0.0001	0.2284	±	0.0001	0.046242	±	0.001188	0.008525	±	0.000307	0.184356	±	0.00815528
KR	20	/0-20	COL-3	22.7898	±	0.0001	0.2275	±	0.0001	0.028512	±	0.000898	0.005406	±	0.000295	0.189604	±	0.0119462
			COL-5	26.3071	±	0.0001	0.228	±	0.0001	0.030835	±	0.000953	0.005919	±	0.000311	0.191957	±	0.0117014
KR	30	/0-20	COL-3	23.0617	±	0.0001	0.2275	±	0.0001	0.033024	±	0.001068	0.005933	±	0.000345	0.179657	±	0.0119539
KR	40	/0-20	COL-2	22.4946	±	0.0001	0.2235	±	0.0001	0.018802	±	0.000458	0.003494	±	0.000124	0.185831	±	0.00799909
			ANU-M465	22.6407	±	0.0001	0.2141	±	0.0001	0.021497	±	0.00118631	0.00361517	±	0.000388749	0.168171	±	0.0203263
KR	57	/0-20	COL-3	23.1035	±	0.0001	0.2278	±	0.0001	0.030531	±	0.000907	0.005077	±	0.000265	0.16629	±	0.00998706
			COL-5	27.8235	±	0.0001	0.2283	±	0.0001	0.029858	±	0.000833	0.005735	±	0.000249	0.192076	±	0.00991273
KR	98	/0-20	COL-3	23.0627	±	0.0001	0.2268	±	0.0001	0.017267	±	0.000613	0.003502	±	0.000225	0.202815	±	0.0148876
			COL-5	24.8806	±	0.0001	0.2278	±	0.0001	0.018842	±	0.000561	0.003437	±	0.000174	0.182412	±	0.0107134
TW	0	/0-20	COL-1	21.2002	±	0.0001	0.2256	±	0.0001	0.02305	±	0.000595	0.004056	±	0.000155	0.175965	±	0.00811488
			COL-2	21.3884	±	0.0001	0.225	±	0.0001	0.074194	±	0.001874	0.013541	±	0.00046	0.182508	±	0.00772592
			COL-4	22.0933	±	0.0001	0.2276	±	0.0001	0.079829	±	0.001897	0.013902	±	0.000395	0.174147	±	0.00645051
			ANU-M465	20.6055	±	0.0001	0.2144	±	0.0001	0.0754718	±	0.00326829	0.0149449	±	0.00141937	0.19802	±	0.0206694
		/20-40	COL-1	20.5313	±	0.0001	0.2266	±	0.0001	0.004702	±	0.000242	0.000738	±	9.7e-05	0.156954	±	0.0221547
			COL-2	21.4569	±	0.0001	0.2258	±	0.0001	0.003167	±	0.000198	0.000833	±	0.000106	0.263025	±	0.0372916
			ANU-M465	20.3612	±	0.0001	0.2165	±	0.0001	0.00277615	±	0.000533641	0.000296099	±	0.000170864	0.106658	±	0.0648722
TW	8	/0-20	COL-1	20.21	±	0.0001	0.226	±	0.0001	0.042682	±	0.001196	0.007505	±	0.000339	0.175835	±	0.00934661
			COL-2	21.7856	±	0.0001	0.226	±	0.0001	0.048246	±	0.001189	0.008581	±	0.00028	0.177859	±	0.00727287
			COL-4	23.5529	±	0.0001	0.2253	±	0.0001	0.0503	±	0.001235	0.009533	±	0.000299	0.189523	±	0.00754906
			ANU-M465	20.2187	±	0.0001	0.2137	±	0.0001	0.0515485	±	0.00235759	0.00958784	±	0.000983487	0.185996	±	0.0208894
TW	12	/0-20	COL-1	22.2835	±	0.0001	0.2259	±	0.0001	0.043301	±	0.001237	0.007261	±	0.000348	0.167687	±	0.00935614
			COL-2	23.3008	±	0.0001	0.2263	±	0.0001	0.043135	±	0.001208	0.008239	±	0.000361	0.191005	±	0.00993249
			COL-4	23.1396	±	0.0001	0.2276	±	0.0001	0.044695	±	0.001222	0.008169	±	0.000343	0.182772	±	0.00915781
			ANU-M465	21.8469	±	0.0001	0.2164	±	0.0001	0.0424286	±	0.0035581	0.0084005	±	0.00153473	0.197991	±	0.0398008
TW	22	/0-20	COL-5	28.0062	±	0.0001	0.2285	±	0.0001	0.048571	±	0.001351	0.009046	±	0.000389	0.186243	±	0.00970196
TW	32	/0-20	COL-1	20.4006	±	0.0001	0.2257	±	0.0001	0.035763	±	0.001064	0.006994	±	0.000345	0.195565	±	0.00953825
			COL-2	22.6914	±	0.0001	0.2257	±	0.0001	0.041126	±	0.00108	0.007481	±	0.00029	0.181904	±	0.0112656
			ANU-M465	22.2421	±	0.0001	0.2031	±	0.0001	0.0410891	±	0.00264705	0.00832167	±	0.00115712	0.202528	±	0.0310368
		/20-40	COL-1	20.4128	±	0.0001	0.2263	±	0.0001	0.002882	±	0.000197	0.000618	±	9.8e-05	0.214434	±	0.0370288
TW	40	/0-20	COL-1	20.0264	±	0.0001	0.2263	±	0.0001	0.027788	±	0.00072	0.005276	±	0.000197	0.189866	±	0.00862909
			COL-2	20.6017	±	0.0001	0.2254	±	0.0001	0.031766	±	0.000812	0.005687	±	0.000209	0.179028	±	0.00801439
			COL-4	23.2649	±	0.0001	0.2259	±	0.0001	0.034601	±	0.000907	0.006348	±	0.000242	0.183463	±	0.00848788
			ANU-M465	21.7101	±	0.0001	0.2145	±	0.0001	0.0379705	±	0.00173424	0.00529068	±	0.00049748	0.139337	±	0.0145656
		/20-40	ANU-M464	19.4852	±	0.0001	0.2095	±	0.0001	0.00995718	±	0.00122198	0.00174616	±	0.000412052	0.175367	±	0.0466443
TW	60	/0-20	COL-1	21.2648	±	0.0001	0.2255	±	0.0001	0.024456	±	0.000824	0.004951	±	0.000302	0.202445	±	0.0141073
			COL-2	22.5257	±	0.0001	0.2257	±	0.0001	0.025805	±	0.000739	0.004933	±	0.000231	0.191165	±	0.0104931
			COL-5	22.4121	±	0.0001	0.2282	±	0.0001	0.025896	±	0.00093	0.00513	±	0.000322	0.1981	±	0.0143257
			ANU-M465	21.6568	±	0.0001	0.2162	±	0.0001	0.0267135	±	0.00136789	0.00480176	±	0.000459075	0.17975	±	0.0194948
		/20-40	ANU-M465	21.5173	±	0.0001	0.2087	±	0.0001	0.00533522	±	0.00112441	0.0012506	±	0.000540999	0.234404	±	0.112795
TW	90	/0-20	COL-3	22.4907	±	0.0001	0.2274	±	0.0001	0.023195	±	0.00085	0.004361	±	0.000304	0.188015	±	0.014807
			COL-5	23.0542	±	0.0001	0.2284	±	0.0001	0.021451	±	0.000662	0.004066	±	0.000216	0.189548	±	0.0116453
			ANU-M65	21.2298	±	0.0001	0.2164	±	0.0001	0.0227846	±	0.00162273	0.0047481	±	0.000581553	0.208391	±	0.0295254
Sample labelling includes the abbreviation of the sample agroecosystem, years of cultivation and sampling depth interval: HS - Harrismith, KR - Kroonstad, TW - Tweespruit. All uncertainties are 1σ.
